# Supplementary material for: The Prediction of Quality Parameters of Craft Beer with FT-MIR and Chemometrics
Source: MDPI journal article supplement (doi:10.3390/foods13081157), 2024-04-11
Supplement: s1 [file s1]

Table S1: Color values of craft beer of different styles (n = 60).

| Beer brands <sup>1</sup> | Beer style <sup>2</sup> | Color (EBC) <sup>3</sup>     | EBC (BJCP) <sup>4</sup> | Beer brands <sup>1</sup> | Beer style <sup>2</sup> | Color (EBC) <sup>3</sup>    | EBC (BJCP) <sup>4</sup> |
|--------------------------|-------------------------|------------------------------|-------------------------|--------------------------|-------------------------|-----------------------------|-------------------------|
| 1                        | American Pale Ale       | 10.1 ± 0.15 <sup>p q r</sup> | 5-10                    | 31                       | India Pale Ale          | 9.8 ± 0.18 <sup>q r s</sup> | 6-14                    |
| 2                        | American Pale Ale       | 5.4 ± 0.03 <sup>x y</sup>    | 5-10                    | 32                       | India Pale Ale          | 8.7 ± 0.03 <sup>s t</sup>   | 6-14                    |
| 3                        | American Pale Ale       | 5.6 ± 0.14 <sup>u v w</sup>  | 5-10                    | 33                       | India Pale Ale          | 9.3 ± 0.08 <sup>r s</sup>   | 6-14                    |
| 4                        | American Pale Ale       | 8.4 ± 0.09 <sup>s t u</sup>  | 5-10                    | 34                       | India Pale Ale          | 12.2 ± 0.07 <sup>o p</sup>  | 6-14                    |
| 5                        | American Pale Ale       | 11.2 ± 0.11 <sup>o p</sup>   | 5-10                    | 35                       | India Pale Ale          | 14.1 ± 0.13 <sup>m n</sup>  | 6-14                    |
| 6                        | American Pale Ale       | 11.8 ± 0.03 <sup>n o p</sup> | 5-10                    | 36                       | India Pale Ale          | 7.1 ± 0.02 <sup>t u v</sup> | 6-14                    |
| 7                        | American Pale Ale       | 10.4 ± 0.10 <sup>m n</sup>   | 5-10                    | 37                       | Kölsch                  | 3.5 ± 0.01 <sup>x y z</sup> | 3.5-5                   |
| 8                        | American Pale Ale       | 8.5 ± 0.01 <sup>s t u</sup>  | 5-10                    | 38                       | Lager                   | 2.7 ± 0.01 <sup>y z</sup>   | 2-4                     |
| 9                        | Barleywine              | 18.9 ± 0.09 <sup>j</sup>     | 10-19                   | 39                       | Lager                   | 2.9 ± 0.01 <sup>z</sup>     | 2-4                     |
| 10                       | Belgian Blond Ale       | 7.1 ± 0.11 <sup>s t u</sup>  | 4-7                     | 40                       | Lager                   | 2.2 ± 0.01 <sup>z</sup>     | 2-4                     |
| 11                       | Berliner Weisse         | 2.1 ± 0.03 <sup>s t</sup>    | 2-3                     | 41                       | Lager                   | 3.9 ± 0.03 <sup>x y z</sup> | 2-4                     |
| 12                       | Black India Pale Ale    | 40.3 ± 0.73 <sup>c</sup>     | 25-40                   | 42                       | Lager                   | 3.2 ± 0.05 <sup>y z</sup>   | 2-4                     |
| 13                       | Blonde Ale              | 4.4 ± 0.07 <sup>x y</sup>    | 3-6                     | 43                       | Oatmeal Stout           | 39.7 ± 0.43 <sup>c</sup>    | 22-40                   |
| 14                       | Blonde Ale              | 4.3 ± 0.05 <sup>r s</sup>    | 3-6                     | 44                       | Oatmeal Stout           | 39.4 ± 0.80 <sup>a</sup>    | 22-40                   |
| 15                       | Blonde Ale              | 5.3 ± 0.03 <sup>v w x</sup>  | 3-6                     | 45                       | Porter                  | 37.3 ± 0.7 <sup>g</sup>     | 22-40                   |
| 16                       | Brown Ale               | 32.2 ± 0.15 <sup>h i</sup>   | 18-35                   | 46                       | Porter                  | 41.3 ± 0.63 <sup>e</sup>    | 22-40                   |
| 17                       | Brown Ale               | 35.5 ± 0.65 <sup>g</sup>     | 18-35                   | 47                       | Porter                  | 41.1 ± 2.72 <sup>e</sup>    | 22-40                   |
| 18                       | Brown Ale               | 32.3 ± 0.15 <sup>h i</sup>   | 18-35                   | 48                       | Porter                  | 40.8 ± 0.20 <sup>f</sup>    | 22-40                   |
| 19                       | Brown Ale               | 31.4 ± 0.05 <sup>i</sup>     | 18-35                   | 49                       | Porter                  | 39.9 ± 0.20 <sup>c</sup>    | 22-40                   |
| 20                       | Brown Ale               | 30.5 ± 0.04 <sup>n o</sup>   | 18-35                   | 50                       | Porter                  | 38.3 ± 1.47 <sup>c</sup>    | 22-40                   |
| 21                       | California Common       | 14.6 ± 0.08 <sup>k l</sup>   | 10-14                   | 51                       | Porter                  | 33.8 ± 0.3 <sup>h</sup>     | 22-40                   |
| 22                       | Cream Ale               | 3.5 ± 0.02 <sup>x y z</sup>  | 2.5-5                   | 52                       | Scottish Ale            | 15.6 ± 1.82 <sup>l m</sup>  | 13-22                   |
| 23                       | Cream Ale               | 3.6 ± 0.04 <sup>x y z</sup>  | 2.5-5                   | 53                       | Stout                   | 41.7 ± 1.93 <sup>e f</sup>  | 30-40                   |
| 24                       | Dark Lager              | 18.1 ± 0.41 <sup>j k</sup>   | 14-22                   | 54                       | Stout                   | 39.5 ± 0.56 <sup>d</sup>    | 30-40                   |
| 25                       | Dubbel                  | 17.5 ± 0.05 <sup>d e</sup>   | 10-17                   | 55                       | Sweet Stout             | 32.8 ± 0.36 <sup>h i</sup>  | 30-40                   |
| 26                       | Golden Ale              | 3.8 ± 0.01 <sup>x y z</sup>  | 2-6                     | 56                       | Sweet Stout             | 39.9 ± 0.60 <sup>b</sup>    | 30-40                   |
| 27                       | Imperial Stout          | 39.9 ± 0.62 <sup>a</sup>     | 30-40                   | 57                       | Vienna                  | 14.3 ± 0.05 <sup>j</sup>    | 9-15                    |
| 28                       | Imperial Stout          | 40.1 ± 0.52 <sup>a</sup>     | 30-40                   | 58                       | Weissbier               | 5.7 ± 0.10 <sup>o p q</sup> | 2-6                     |
| 29                       | India Pale Ale          | 8.4 ± 0.08 <sup>s t u</sup>  | 6-14                    | 59                       | Witbier                 | 3.6 ± 0.04 <sup>x y z</sup> | 2-4                     |
| 30                       | India Pale Ale          | 8.1 ± 0.04 <sup>s t u</sup>  | 6-14                    | 60                       | Witbier                 | 4.1 ± 0.01 <sup>w x y</sup> | 2-4                     |

<sup>1</sup> Beer brands were assigned a number (1-60).

<sup>2</sup> Beer style established by the Beer Judge Certification Program (BJCP).

<sup>3</sup> Color units EBC (European Brewery Convention).

<sup>4</sup> Values accepted by the Beer Judge Certification Program (1-65 EBC).

Values represent means ± standard deviation. Means with different letters per column indicate significant statistical differences (Tukey,  $p \leq 0.05$ ).

Table S2: Specific gravity values of craft beer of different styles (n = 60).

| Beer brands <sup>1</sup> | Beer style <sup>2</sup> | SG <sup>3</sup>                    | SG (BJCP) <sup>4</sup> | Beer brands <sup>1</sup> | Beer style <sup>2</sup> | SG <sup>3</sup>                    | SG (BJCP) <sup>4</sup> |
|--------------------------|-------------------------|------------------------------------|------------------------|--------------------------|-------------------------|------------------------------------|------------------------|
| 1                        | American Pale Ale       | 1.013 ± 0.01 <sup>z aa ab</sup>    | 1.010-1.015            | 31                       | India Pale Ale          | 1.011 ± 0.06 <sup>vwxyz aa</sup>   | 1.008-1.014            |
| 2                        | American Pale Ale       | 1.016 ± 0.01 <sup>tuvwxyz</sup>    | 1.010-1.015            | 32                       | India Pale Ale          | 1.012 ± 0.05 <sup>nopqrstu</sup>   | 1.008-1.014            |
| 3                        | American Pale Ale       | 1.012 ± 0.01 <sup>ijklmn</sup>     | 1.010-1.015            | 33                       | India Pale Ale          | 1.011 ± 0.08 <sup>stuvwxy</sup>    | 1.008-1.014            |
| 4                        | American Pale Ale       | 1.012 ± 0.02 <sup>ijklmnop</sup>   | 1.010-1.015            | 34                       | India Pale Ale          | 1.014 ± 0.04 <sup>uvwxyz aa</sup>  | 1.008-1.014            |
| 5                        | American Pale Ale       | 1.010 ± 0.01 <sup>opqrstu</sup>    | 1.010-1.015            | 35                       | India Pale Ale          | 1.014 ± 0.06 <sup>hijk</sup>       | 1.008-1.014            |
| 6                        | American Pale Ale       | 1.010 ± 0.03 <sup>lmnopqrs</sup>   | 1.010-1.015            | 36                       | India Pale Ale          | 1.008 ± 0.02 <sup>qrstuvw</sup>    | 1.008-1.014            |
| 7                        | American Pale Ale       | 1.015 ± 0.02 <sup>tuvwxyz</sup>    | 1.010-1.015            | 37                       | Kölsch                  | 1.011 ± 0.02 <sup>klmnop</sup>     | 1.007-1.011            |
| 8                        | American Pale Ale       | 1.015 ± 0.01 <sup>rstuvw x</sup>   | 1.010-1.015            | 38                       | Lager                   | 1.005 ± 0.04 <sup>wxyz aa ab</sup> | 1.004-1.010            |
| 9                        | Barleywine              | 1.019 ± 0.02 <sup>cde</sup>        | 1.016-1.030            | 39                       | Lager                   | 1.010 ± 0.06 <sup>ijkl</sup>       | 1.004-1.010            |
| 10                       | Belgian Blond Ale       | 1.008 ± 0.02 <sup>yz aa ab</sup>   | 1.008-1.018            | 40                       | Lager                   | 1.008 ± 0.07 <sup>pqrstuv</sup>    | 1.004-1.010            |
| 11                       | Berliner Weisse         | 1.006 ± 0.01 <sup>ijklm</sup>      | 1.003-1.006            | 41                       | Lager                   | 1.007 ± 0.04 <sup>tuvwxyz</sup>    | 1.004-1.010            |
| 12                       | Black India Pale Ale    | 1.006 ± 0.04 <sup>tuvwxyz</sup>    | 1.010-1.018            | 42                       | Lager                   | 1.004 ± 0.08 <sup>aa ab</sup>      | 1.004-1.010            |
| 13                       | Blonde Ale              | 1.015 ± 0.04 <sup>fghi</sup>       | 1.008-1.018            | 43                       | Oatmeal Stout           | 1.018 ± 0.09 <sup>cd</sup>         | 1.010-1.018            |
| 14                       | Blonde Ale              | 1.008 ± 0.05 <sup>oprstuv</sup>    | 1.008-1.018            | 44                       | Oatmeal Stout           | 1.020 ± 0.03 <sup>a</sup>          | 1.010-1.018            |
| 15                       | Blonde Ale              | 1.018 ± 0.02 <sup>def</sup>        | 1.008-1.018            | 45                       | Porter                  | 1.009 ± 0.07 <sup>uvwxyz aa</sup>  | 1.008-1.014            |
| 16                       | Brown Ale               | 1.013 ± 0.01 <sup>uvwxyz aa</sup>  | 1.008-1.013            | 46                       | Porter                  | 1.014 ± 0.08 <sup>efgh</sup>       | 1.008-1.014            |
| 17                       | Brown Ale               | 1.013 ± 0.05 <sup>ghij</sup>       | 1.008-1.013            | 47                       | Porter                  | 1.014 ± 0.06 <sup>cd</sup>         | 1.008-1.014            |
| 18                       | Brown Ale               | 1.009 ± 0.01 <sup>mnopqrst</sup>   | 1.008-1.013            | 48                       | Porter                  | 1.014 ± 0.09 <sup>ghij</sup>       | 1.008-1.014            |
| 19                       | Brown Ale               | 1.008 ± 0.04 <sup>wxyz aa ab</sup> | 1.008-1.013            | 49                       | Porter                  | 1.013 ± 0.04 <sup>ijkl</sup>       | 1.008-1.014            |
| 20                       | Brown Ale               | 1.013 ± 0.05 <sup>hijk</sup>       | 1.008-1.013            | 50                       | Porter                  | 1.011 ± 0.06 <sup>ijklmnop</sup>   | 1.008-1.014            |
| 21                       | California Common       | 1.014 ± 0.04 <sup>c</sup>          | 1.011-1.014            | 51                       | Porter                  | 1.010 ± 0.08 <sup>def</sup>        | 1.008-1.014            |
| 22                       | Cream Ale               | 1.007 ± 0.03 <sup>xyz aa ab</sup>  | 1.006-1.012            | 52                       | Scottish Ale            | 1.013 ± 0.03 <sup>ijkl</sup>       | 1.010-1.016            |
| 23                       | Cream Ale               | 1.010 ± 0.02 <sup>ghij</sup>       | 1.006-1.012            | 53                       | Stout                   | 1.012 ± 0.02 <sup>qrstuvw</sup>    | 1.010-1.022            |
| 24                       | Dark Lager              | 1.012 ± 0.06 <sup>efg</sup>        | 1.008-1.012            | 54                       | Stout                   | 1.010 ± 0.04 <sup>lmnopqr</sup>    | 1.010-1.022            |
| 25                       | Dubbel                  | 1.018 ± 0.03 <sup>ijkl</sup>       | 1.008-1.018            | 55                       | Sweet Stout             | 1.014 ± 0.05 <sup>hijk</sup>       | 1.012-1.024            |
| 26                       | Golden Ale              | 1.006 ± 0.07 <sup>ab</sup>         | 1.006-1.012            | 56                       | Sweet Stout             | 1.012 ± 0.04 <sup>ijklmno</sup>    | 1.012-1.024            |
| 27                       | Imperial Stout          | 1.018 ± 0.06 <sup>ijkl</sup>       | 1.018-1.030            | 57                       | Vienna                  | 1.010 ± 0.03 <sup>klmnopq</sup>    | 1.010-1.014            |
| 28                       | Imperial Stout          | 1.030 ± 0.03 <sup>b</sup>          | 1.018-1.030            | 58                       | Weissbier               | 1.013 ± 0.06 <sup>tuvwxyz</sup>    | 1.010-1.014            |
| 29                       | India Pale Ale          | 1.008 ± 0.05 <sup>z aa ab</sup>    | 1.008-1.014            | 59                       | Witbier                 | 1.008 ± 0.04 <sup>xyz aa ab</sup>  | 1.008-1.012            |
| 30                       | India Pale Ale          | 1.012 ± 0.08 <sup>ijkl</sup>       | 1.008-1.014            | 60                       | Witbier                 | 1.010 ± 0.02 <sup>uvwxyz aa</sup>  | 1.008-1.012            |

<sup>1</sup> Beer brands were assigned a number (1-60).

<sup>2</sup> Beer style established by the Beer Judge Certification Program (BJCP).

<sup>3</sup> SG (Specific Gravity).

<sup>4</sup> Values accepted by the Beer Judge Certification Program (1.001-1.040).

Values represent means ± standard deviation. Means with different letters per column indicate significant statistical differences (Tukey,  $p \leq 0.05$ ).

Table S3: Alcohol by volume of craft beer of different styles (n = 60).

| Beer brands <sup>1</sup> | Beer style <sup>2</sup> | Alcohol (% v/v) <sup>3</sup>     | Alcohol on label (% v/v) <sup>4</sup> | Beer brands <sup>1</sup> | Beer style <sup>2</sup> | Alcohol (% v/v) <sup>3</sup>   | Alcohol on label (% v/v) <sup>4</sup> |
|--------------------------|-------------------------|----------------------------------|---------------------------------------|--------------------------|-------------------------|--------------------------------|---------------------------------------|
| 1                        | American Pale Ale       | 4.7 ± 0.47 <sup>ab ac ad</sup>   | 5                                     | 31                       | India Pale Ale          | 7.1 ± 0.57 <sup>hij</sup>      | 7                                     |
| 2                        | American Pale Ale       | 6.0 ± 0.47 <sup>fg</sup>         | 5                                     | 32                       | India Pale Ale          | 5.9 ± 0.00 <sup>fgh</sup>      | 5.7                                   |
| 3                        | American Pale Ale       | 6.2 ± 0.0 <sup>cd</sup>          | 6.5                                   | 33                       | India Pale Ale          | 7.2 ± 0.00 <sup>klmnop</sup>   | 7.3                                   |
| 4                        | American Pale Ale       | 5.1 ± 0.47 <sup>zaa ab</sup>     | 5.2                                   | 34                       | India Pale Ale          | 5.9 ± 0.00 <sup>mno pq</sup>   | 5.8                                   |
| 5                        | American Pale Ale       | 4.7 ± 0.00 <sup>uvwxyz</sup>     | 4.5                                   | 35                       | India Pale Ale          | 6.8 ± 0.00 <sup>ijkl</sup>     | 6.4                                   |
| 6                        | American Pale Ale       | 5.6 ± 0.00 <sup>ijklm</sup>      | 6                                     | 36                       | India Pale Ale          | 7.1 ± 0.47 <sup>ef</sup>       | 7                                     |
| 7                        | American Pale Ale       | 5.6 ± 0.00 <sup>ijklm</sup>      | 5.9                                   | 37                       | Kölsch                  | 5.6 ± 0.00 <sup>wxyz</sup>     | 5                                     |
| 8                        | American Pale Ale       | 5.1 ± 0.00 <sup>lmnop</sup>      | 5.2                                   | 38                       | Lager                   | 4.9 ± 0.00 <sup>zaa ab</sup>   | 4.8                                   |
| 9                        | Barleywine              | 10.4 ± 0.00 <sup>a</sup>         | 10                                    | 39                       | Lager                   | 4.5 ± 0.00 <sup>ad</sup>       | 3.9                                   |
| 10                       | Belgian Blond Ale       | 6.3 ± 0.00 <sup>fghi</sup>       | 6.2                                   | 40                       | Lager                   | 5.1 ± 0.00 <sup>ac ad</sup>    | 4.2                                   |
| 11                       | Berliner Weisse         | 4.0 ± 0.00 <sup>stuvwxy</sup>    | 3.5                                   | 41                       | Lager                   | 5.4 ± 0.00 <sup>pqrstuv</sup>  | 5                                     |
| 12                       | Black India Pale Ale    | 6.2 ± 0.00 <sup>fghi</sup>       | 6.5                                   | 42                       | Lager                   | 4.8 ± 0.00 <sup>aa ab ac</sup> | 4                                     |
| 13                       | Blonde Ale              | 4.6 ± 0.00 <sup>xyz aa</sup>     | 4.5                                   | 43                       | Oatmeal Stout           | 4.5 ± 0.00 <sup>tuvwxy</sup>   | 4.2                                   |
| 14                       | Blonde Ale              | 4.6 ± 0.00 <sup>opqrst</sup>     | 5                                     | 44                       | Oatmeal Stout           | 10.0 ± 0.00 <sup>b</sup>       | 10                                    |
| 15                       | Blonde Ale              | 5.3 ± 0.00 <sup>yz aa ab</sup>   | 5                                     | 45                       | Porter                  | 6.5 ± 0.00 <sup>stuvwxy</sup>  | 6                                     |
| 16                       | Brown Ale               | 6.4 ± 0.00 <sup>pqrstuvw</sup>   | 6                                     | 46                       | Porter                  | 6.5 ± 0.47 <sup>hij</sup>      | 6.2                                   |
| 17                       | Brown Ale               | 4.6 ± 0.47 <sup>wxyz</sup>       | 4.8                                   | 47                       | Porter                  | 6.3 ± 0.47 <sup>ijk</sup>      | 6.2                                   |
| 18                       | Brown Ale               | 5.3 ± 0.47 <sup>fghi</sup>       | 5                                     | 48                       | Porter                  | 5.0 ± 0.00 <sup>nopr s</sup>   | 5.5                                   |
| 19                       | Brown Ale               | 5.9 ± 0.00 <sup>ijk</sup>        | 5.5                                   | 49                       | Porter                  | 5.5 ± 0.00 <sup>pqrst</sup>    | 5.5                                   |
| 20                       | Brown Ale               | 5.1 ± 0.00 <sup>pqrstuvw x</sup> | 5.3                                   | 50                       | Porter                  | 5.8 ± 0.47 <sup>de</sup>       | 5.2                                   |
| 21                       | California Common       | 5.5 ± 0.00 <sup>xyz aa</sup>     | 5                                     | 51                       | Porter                  | 4.6 ± 0.00 <sup>opqrst</sup>   | 4.6                                   |
| 22                       | Cream Ale               | 5.5 ± 0.00 <sup>pqrst</sup>      | 5                                     | 52                       | Scottish Ale            | 6.4 ± 0.00 <sup>pqrstuv</sup>  | 6.1                                   |
| 23                       | Cream Ale               | 4.3 ± 0.47 <sup>yz aa ab</sup>   | 4.5                                   | 53                       | Stout                   | 4.8 ± 0.00 <sup>mno pqr</sup>  | 5                                     |
| 24                       | Dark Lager              | 5.5 ± 0.00 <sup>pqrstu</sup>     | 5                                     | 54                       | Stout                   | 5.6 ± 0.00 <sup>ijklmn</sup>   | 5.5                                   |
| 25                       | Dubbel                  | 6.6 ± 0.00 <sup>bc</sup>         | 6.4                                   | 55                       | Sweet Stout             | 9.2 ± 0.00 <sup>b</sup>        | 9                                     |
| 26                       | Golden Ale              | 5.1 ± 0.47 <sup>pqrstuvw x</sup> | 5                                     | 56                       | Sweet Stout             | 6.0 ± 0.00 <sup>mno p</sup>    | 6                                     |
| 27                       | Imperial Stout          | 9.0 ± 0.00 <sup>fg</sup>         | 9                                     | 57                       | Vienna                  | 5.5 ± 0.47 <sup>vwxyz</sup>    | 5                                     |
| 28                       | Imperial Stout          | 8.1 ± 0.00 <sup>ij</sup>         | 8                                     | 58                       | Weissbier               | 4.4 ± 0.00 <sup>pqrstuv</sup>  | 4.8                                   |
| 29                       | India Pale Ale          | 7.8 ± 0.00 <sup>nopr s</sup>     | 7                                     | 59                       | Witbier                 | 5.0 ± 0.00 <sup>ijklmno</sup>  | 4.8                                   |
| 30                       | India Pale Ale          | 7.3 ± 0.00 <sup>fghi</sup>       | 7.1                                   | 60                       | Witbier                 | 5.0 ± 0.00 <sup>stuvwxy</sup>  | 5                                     |

<sup>1</sup> Beer brands were assigned a number (1-60).

<sup>2</sup> Beer style established by the Beer Judge Certification Program (BJCP).

<sup>3</sup> Alcohol (% v/v).

<sup>4</sup> Alcohol (% v/v) reported by the manufacturer.

Values accepted by NOM-199-SCFI-2017 (> 2% < 20%, v/v).

Values represent means ± standard deviation. Means with different letters per column indicate significant statistical differences (Tukey,  $p \leq 0.05$ ).

Table S4: Bitterness values of craft beer of different styles (n = 60).

| Beer brands <sup>1</sup> | Beer style <sup>2</sup> | Bitterness (IBU) <sup>3</sup>                  | IBU (BJCP) <sup>4</sup> | Beer brands <sup>1</sup> | Beer style <sup>2</sup> | Bitterness (IBU) <sup>3</sup>                  | IBU (BJCP) <sup>4</sup> |
|--------------------------|-------------------------|------------------------------------------------|-------------------------|--------------------------|-------------------------|------------------------------------------------|-------------------------|
| 1                        | American Pale Ale       | 33.1 ± 1.05 <sup>g h i j</sup>                 | 30-50                   | 31                       | India Pale Ale          | 47.5 ± 5.5 <sup>d</sup>                        | 40-70                   |
| 2                        | American Pale Ale       | 34.5 ± 0.85 <sup>m n o p</sup>                 | 30-50                   | 32                       | India Pale Ale          | 39.0 ± 2.81 <sup>f g</sup>                     | 40-70                   |
| 3                        | American Pale Ale       | 38.0 ± 0.16 <sup>j k l m</sup>                 | 30-50                   | 33                       | India Pale Ale          | 66.0 ± 1.72 <sup>b c</sup>                     | 40-70                   |
| 4                        | American Pale Ale       | 41.1 ± 1.37 <sup>e f</sup>                     | 30- 50                  | 34                       | India Pale Ale          | 65.0 ± 1.57 <sup>b c</sup>                     | 40-70                   |
| 5                        | American Pale Ale       | 31.0 ± 1.83 <sup>o p q r s t</sup>             | 30-50                   | 35                       | India Pale Ale          | 39.0 ± 1.48 <sup>f g</sup>                     | 40-70                   |
| 6                        | American Pale Ale       | 42.1 ± 1.07 <sup>w x y z a a a b a c a d</sup> | 30-50                   | 36                       | India Pale Ale          | 63.0 ± 0.87 <sup>c</sup>                       | 40-70                   |
| 7                        | American Pale Ale       | 36.0 ± 0.92 <sup>f g h i</sup>                 | 30-50                   | 37                       | Kölsch                  | 19.0 ± 0.65 <sup>v w x y z a a a b a c</sup>   | 18-30                   |
| 8                        | American Pale Ale       | 46.1 ± 0.46 <sup>s t u v w x y</sup>           | 30-50                   | 38                       | Lager                   | 15.5 ± 2.18 <sup>f g h i</sup>                 | 8-18                    |
| 9                        | Barleywine              | 55.5 ± 1.96 <sup>d e</sup>                     | 50-100                  | 39                       | Lager                   | 17.0 ± 0.72 <sup>r s t u v w</sup>             | 8-18                    |
| 10                       | Belgian Blond Ale       | 23.0 ± 2.62 <sup>m n o p q r</sup>             | 15-30                   | 40                       | Lager                   | 16.5 ± 1.27 <sup>k l m n o</sup>               | 8-18                    |
| 11                       | Berliner Weisse         | 14.5 ± 0.40 <sup>u v w x y z a a</sup>         | 3-8                     | 41                       | Lager                   | 9.0 ± 1.16 <sup>a a a b a c a d a e</sup>      | 8-18                    |
| 12                       | Black India Pale Ale    | 70.0 ± 1.26 <sup>b</sup>                       | 50-90                   | 42                       | Lager                   | 14.0 ± 0.25 <sup>a e</sup>                     | 8-18                    |
| 13                       | Blonde Ale              | 15.0 ± 0.30 <sup>z a a b a c a d a e</sup>     | 15-28                   | 43                       | Oatmeal Stout           | 38.5 ± 1.33 <sup>a a a b a c a d a e</sup>     | 25-40                   |
| 14                       | Blonde Ale              | 15.5 ± 1.42 <sup>y z a a a b a c a d</sup>     | 15-28                   | 44                       | Oatmeal Stout           | 29.0 ± 1.67 <sup>j k l m</sup>                 | 25-40                   |
| 15                       | Blonde Ale              | 15.5 ± 1.12 <sup>w x y z a a a b a c a d</sup> | 15-28                   | 45                       | Porter                  | 29.5 ± 1.22 <sup>x y z a a a b a c a d</sup>   | 25-50                   |
| 16                       | Brown Ale               | 20.5 ± 0.55 <sup>v w x y z a a a b a c</sup>   | 20-30                   | 46                       | Porter                  | 27.5 ± 1.08 <sup>j k l m n</sup>               | 25-50                   |
| 17                       | Brown Ale               | 22.0 ± 0.48 <sup>n o p q r s</sup>             | 20-30                   | 47                       | Porter                  | 23.5 ± 0.65 <sup>m n o p q</sup>               | 25-50                   |
| 18                       | Brown Ale               | 30.5 ± 2.31 <sup>e f</sup>                     | 20-30                   | 48                       | Porter                  | 28.0 ± 0.72 <sup>j k l m</sup>                 | 25-50                   |
| 19                       | Brown Ale               | 33.0 ± 3.9 <sup>d e</sup>                      | 20-30                   | 49                       | Porter                  | 27.5 ± 0.40 <sup>j k l m n</sup>               | 25-50                   |
| 20                       | Brown Ale               | 31.0 ± 0.68 <sup>i j k l</sup>                 | 20-30                   | 50                       | Porter                  | 25.0 ± 0.58 <sup>l m n o p</sup>               | 25-50                   |
| 21                       | California Common       | 32.0 ± 2.47 <sup>m n o p q r</sup>             | 30-45                   | 51                       | Porter                  | 26.5 ± 1.24 <sup>s t u v w x</sup>             | 25-50                   |
| 22                       | Cream Ale               | 18.5 ± 2.05 <sup>q r s t u v</sup>             | 8-20                    | 52                       | Scottish Ale            | 16.5 ± 0.46 <sup>a d a e</sup>                 | 15-30                   |
| 23                       | Cream Ale               | 14.0 ± 2.49 <sup>u v w x y z a a a b</sup>     | 8-20                    | 53                       | Stout                   | 39.0 ± 1.31 <sup>j k l m</sup>                 | 35-75                   |
| 24                       | Dark Lager              | 21.0 ± 0.35 <sup>l m n o p</sup>               | 8-20                    | 54                       | Stout                   | 38.1 ± 1.92 <sup>f g h</sup>                   | 35-75                   |
| 25                       | Dubbel                  | 18.5 ± 2.00 <sup>q r s t u v</sup>             | 15-25                   | 55                       | Sweet Stout             | 32.0 ± 0.30 <sup>i j k</sup>                   | 20-40                   |
| 26                       | Golden Ale              | 29.0 ± 2.35 <sup>j k l m</sup>                 | 20-45                   | 56                       | Sweet Stout             | 28.0 ± 1.49 <sup>w x y z a a a b a c a d</sup> | 20-40                   |
| 27                       | Imperial Stout          | 64.5 ± 4.40 <sup>b c</sup>                     | 50-90                   | 57                       | Vienna                  | 25.5 ± 1.42 <sup>t u v w x y z</sup>           | 18-30                   |
| 28                       | Imperial Stout          | 72.0 ± 0.86 <sup>h i j k</sup>                 | 50-90                   | 58                       | Weissbier               | 11.0 ± 0.62 <sup>x y z a a a b a c a d</sup>   | 8-15                    |
| 29                       | India Pale Ale          | 65.5 ± 2.70 <sup>b c</sup>                     | 40-70                   | 59                       | Witbier                 | 17.0 ± 1.72 <sup>a c a d a e</sup>             | 8-20                    |
| 30                       | India Pale Ale          | 69.0 ± 0.81 <sup>a</sup>                       | 40-70                   | 60                       | Witbier                 | 19.5 ± 1.34 <sup>p q r s t u</sup>             | 8-20                    |

<sup>1</sup> Beer brands were assigned a number (1-60).

<sup>2</sup> Beer style established by the Beer Judge Certification Program (BJCP).

<sup>3</sup> IBU (International Bitterness Units).

<sup>4</sup> Values accepted by the Beer Judge Certification Program (1-120 IBU).

Values represent means ± standard deviation. Means with different letters per column indicate significant statistical differences (Tukey,  $p \leq 0.05$ ).

Table S5: Turbidity values of craft beer of different styles (n = 60).

| Beer brands <sup>1</sup> | Beer style <sup>2</sup> | Turbidity (NTU) <sup>3</sup>            | Beer brands <sup>1</sup> | Beer style <sup>2</sup> | Turbidity (NTU) <sup>3</sup>          |
|--------------------------|-------------------------|-----------------------------------------|--------------------------|-------------------------|---------------------------------------|
| 1                        | American Pale Ale       | 35.3 ± 1.15 <sup>h</sup>                | 31                       | India Pale Ale          | 22.3 ± 2.08 <sup>k<sup>1</sup></sup>  |
| 2                        | American Pale Ale       | 5.0 ± 0.00 <sup>ab ac ad ae af</sup>    | 32                       | India Pale Ale          | 3.0 ± 0.00 <sup>af ag</sup>           |
| 3                        | American Pale Ale       | 38.3 ± 0.57 <sup>g</sup>                | 33                       | India Pale Ale          | 13.0 ± 1.00 <sup>r s t</sup>          |
| 4                        | American Pale Ale       | 4.0 ± 1.00 <sup>ad ae af ag</sup>       | 34                       | India Pale Ale          | 7.0 ± 0.00 <sup>x y z aa ab ac</sup>  |
| 5                        | American Pale Ale       | 10.0 ± 0.00 <sup>u v w</sup>            | 35                       | India Pale Ale          | 21.0 ± 0.00 <sup>k l m n</sup>        |
| 6                        | American Pale Ale       | 5.0 ± 0.00 <sup>ab ac ad ae af</sup>    | 36                       | India Pale Ale          | 3.3 ± 0.57 <sup>ae af ag</sup>        |
| 7                        | American Pale Ale       | 6.0 ± 0.00 <sup>y z aa ab ac ad</sup>   | 37                       | Kölsch                  | 19.3 ± 1.52 <sup>m n</sup>            |
| 8                        | American Pale Ale       | 6.6 ± 0.57 <sup>x y z aa ab ac</sup>    | 38                       | Lager                   | 3.0 ± 1.00 <sup>af ag</sup>           |
| 9                        | Barleywine              | 11.0 ± 0.00 <sup>t u v</sup>            | 39                       | Lager                   | 2.0 ± 0.00 <sup>ag</sup>              |
| 10                       | Belgian Blond Ale       | 8.0 ± 0.00 <sup>w x y z</sup>           | 40                       | Lager                   | 5.0 ± 1.00 <sup>ab ac ad ae af</sup>  |
| 11                       | Berliner Weisse         | 20.0 ± 0.00 <sup>l m n</sup>            | 41                       | Lager                   | 11.3 ± 0.57 <sup>s t u v</sup>        |
| 12                       | Black India Pale Ale    | 25.3 ± 1.15 <sup>i j</sup>              | 42                       | Lager                   | 8.3 ± 0.57 <sup>w x y</sup>           |
| 13                       | Blonde Ale              | 15.3 ± 0.57 <sup>p q r</sup>            | 43                       | Oatmeal Stout           | 13.6 ± 0.57 <sup>q r s</sup>          |
| 14                       | Blonde Ale              | 22.0 ± 0.00 <sup>k l</sup>              | 44                       | Oatmeal Stout           | 114.3 ± 0.57 <sup>b</sup>             |
| 15                       | Blonde Ale              | 5.3 ± 0.57 <sup>aa ab ac ad ae af</sup> | 45                       | Porter                  | 16.0 ± 1.00 <sup>p q</sup>            |
| 16                       | Brown Ale               | 4.6 ± 0.57 <sup>ac ad ae af</sup>       | 46                       | Porter                  | 16.6 ± 0.57 <sup>o p</sup>            |
| 17                       | Brown Ale               | 7.3 ± 0.57 <sup>x y z aa</sup>          | 47                       | Porter                  | 13.0 ± 0.00 <sup>r s t</sup>          |
| 18                       | Brown Ale               | 5.6 ± 0.57 <sup>z aa ab ac ad ae</sup>  | 48                       | Porter                  | 56.3 ± 2.08 <sup>d</sup>              |
| 19                       | Brown Ale               | 19.0 ± 1.00 <sup>n o</sup>              | 49                       | Porter                  | 12.6 ± 0.57 <sup>s t</sup>            |
| 20                       | Brown Ale               | 21.6 ± 1.52 <sup>k l m</sup>            | 50                       | Porter                  | 4.0 ± 0.00 <sup>ad ae af ag</sup>     |
| 21                       | California Common       | 39.6 ± 0.57 <sup>g</sup>                | 51                       | Porter                  | 47.0 ± 0.57 <sup>e</sup>              |
| 22                       | Cream Ale               | 39.3 ± 0.57 <sup>g</sup>                | 52                       | Scottish Ale            | 9.0 ± 0.00 <sup>v w x</sup>           |
| 23                       | Cream Ale               | 8.0 ± 0.00 <sup>w x y z</sup>           | 53                       | Stout                   | 25.6 ± 0.57 <sup>i</sup>              |
| 24                       | Dark Lager              | 44.3 ± 0.57 <sup>f</sup>                | 54                       | Stout                   | 7.3 ± 0.57 <sup>x y z aa ab</sup>     |
| 25                       | Dubbel                  | 7.0 ± 0.57 <sup>w x y z aa</sup>        | 55                       | Sweet Stout             | 23.0 ± 0.00 <sup>j k</sup>            |
| 26                       | Golden Ale              | 9.0 ± 0.00 <sup>v w x</sup>             | 56                       | Sweet Stout             | 64.0 ± 0.00 <sup>c</sup>              |
| 27                       | Imperial Stout          | 12.0 ± 1.00 <sup>s t u</sup>            | 57                       | Vienna                  | 6.3 ± 1.15 <sup>y z aa ab ac ad</sup> |
| 28                       | Imperial Stout          | 201.3 ± 1.52 <sup>a</sup>               | 58                       | Weissbier               | 26.0 ± 0.00 <sup>i</sup>              |
| 29                       | India Pale Ale          | 10.0 ± 0.00 <sup>u v w</sup>            | 59                       | Witbier                 | 16.3 ± 0.57 <sup>p</sup>              |
| 30                       | India Pale Ale          | 10.0 ± 1.00 <sup>u v w</sup>            | 60                       | Witbier                 | 11.0 ± 0.00 <sup>t u v</sup>          |

<sup>1</sup> Beer brands were assigned a number (1-60).

<sup>2</sup> Beer style established by the Beer Judge Certification Program (BJCP).

<sup>3</sup> NTU (Nephelometric Turbidity Units).

Values represent means ± standard deviation. Means with different letters per column indicate significant statistical differences (Tukey,  $p \leq 0.05$ ).

Table S6: pH and acidity values of craft beer of different styles (n = 60).

| Beer brands <sup>1</sup> | Beer style <sup>2</sup> | pH                                 | Acidity (mg/L) <sup>3</sup>         | Beer brands <sup>1</sup> | Beer style <sup>2</sup> | pH                                 | Acidity (mg/L) <sup>3</sup>           |
|--------------------------|-------------------------|------------------------------------|-------------------------------------|--------------------------|-------------------------|------------------------------------|---------------------------------------|
| 1                        | American Pale Ale       | 4.06 ± 0.01 <sup>u v w x</sup>     | 20.76 ± 1.36 <sup>j k l m n</sup>   | 31                       | India Pale Ale          | 4.30 ± 0.01 <sup>l m n o</sup>     | 20.16 ± 1.56 <sup>k l m n o</sup>     |
| 2                        | American Pale Ale       | 3.92 ± 0.03 <sup>y z a a</sup>     | 18.60 ± 0.74 <sup>l m n o p q</sup> | 32                       | India Pale Ale          | 4.61 ± 0.01 <sup>c d e</sup>       | 25.44 ± 1.81 <sup>h i</sup>           |
| 3                        | American Pale Ale       | 4.21 ± 0.02 <sup>o p q r s</sup>   | 22.08 ± 0.54 <sup>i j k l</sup>     | 33                       | India Pale Ale          | 4.63 ± 0.00 <sup>c d</sup>         | 20.88 ± 0.72 <sup>j k l m</sup>       |
| 4                        | American Pale Ale       | 4.23 ± 0.00 <sup>o p q r s</sup>   | 19.08 ± 1.29 <sup>l m n o p</sup>   | 34                       | India Pale Ale          | 4.54 ± 0.01 <sup>d e f g</sup>     | 12.72 ± 0.41 <sup>s t u v w</sup>     |
| 5                        | American Pale Ale       | 3.85 ± 0.01 <sup>a a a b</sup>     | 19.08 ± 1.08 <sup>l m n o p</sup>   | 35                       | India Pale Ale          | 3.77 ± 0.00 <sup>a b a c a d</sup> | 18.72 ± 0.36 <sup>l m n o p r</sup>   |
| 6                        | American Pale Ale       | 4.23 ± 0.03 <sup>o p q r</sup>     | 18.84 ± 1.36 <sup>l m n o p</sup>   | 36                       | India Pale Ale          | 4.42 ± 0.02 <sup>h i j k</sup>     | 17.88 ± 0.41 <sup>m n o p r</sup>     |
| 7                        | American Pale Ale       | 4.51 ± 0.00 <sup>e f g h</sup>     | 10.44 ± 0.95 <sup>v w x y</sup>     | 37                       | Kölsch                  | 4.52 ± 0.05 <sup>e f g</sup>       | 10.92 ± 1.15 <sup>u v w x</sup>       |
| 8                        | American Pale Ale       | 4.30 ± 0.05 <sup>l m n o</sup>     | 17.52 ± 0.74 <sup>n o p q r</sup>   | 38                       | Lager                   | 3.90 ± 0.05 <sup>z a a</sup>       | 12.84 ± 0.54 <sup>s t u v w</sup>     |
| 9                        | Barleywine              | 4.70 ± 0.03 <sup>b c</sup>         | 24.24 ± 1.09 <sup>h i j</sup>       | 39                       | Lager                   | 3.84 ± 0.01 <sup>a a a b a c</sup> | 10.8 ± 0.95 <sup>u v w x</sup>        |
| 10                       | Belgian Blond Ale       | 4.29 ± 0.03 <sup>l m n o</sup>     | 26.52 ± 0.90 <sup>h</sup>           | 40                       | Lager                   | 4.23 ± 0.01 <sup>o p r s</sup>     | 6.36 ± 2.16 <sup>z a a</sup>          |
| 11                       | Berliner Weisse         | 3.46 ± 0.03 <sup>a e</sup>         | 32.16 ± 0.90 <sup>d e</sup>         | 41                       | Lager                   | 3.69 ± 0.03 <sup>a d</sup>         | 18.72 ± 0.72 <sup>l m n o p q</sup>   |
| 12                       | Black India Pale Ale    | 4.36 ± 0.03 <sup>j k l m</sup>     | 26.76 ± 2.16 <sup>g h</sup>         | 42                       | Lager                   | 4.15 ± 0.06 <sup>q r s t u</sup>   | 14.76 ± 0.72 <sup>q r s t u</sup>     |
| 13                       | Blonde Ale              | 3.51 ± 0.00 <sup>a e</sup>         | 19.92 ± 0.41 <sup>l m n o p</sup>   | 43                       | Oatmeal Stout           | 4.15 ± 0.01 <sup>q r s t u</sup>   | 17.52 ± 1.45 <sup>n o p q r</sup>     |
| 14                       | Blonde Ale              | 4.11 ± 0.02 <sup>s t u v w</sup>   | 18.96 ± 1.98 <sup>l m n o p</sup>   | 44                       | Oatmeal Stout           | 5.03 ± 0.02 <sup>a</sup>           | 47.76 ± 0.54 <sup>a</sup>             |
| 15                       | Blonde Ale              | 4.16 ± 0.02 <sup>p q r s t u</sup> | 4.92 ± 1.36 <sup>a a</sup>          | 45                       | Porter                  | 3.53 ± 0.01 <sup>a e</sup>         | 38.04 ± 1.36 <sup>b c</sup>           |
| 16                       | Brown Ale               | 4.27 ± 0.03 <sup>m n o p</sup>     | 14.4 ± 0.95 <sup>r s t u v</sup>    | 46                       | Porter                  | 3.91 ± 0.00 <sup>z a a</sup>       | 16.56 ± 0.36 <sup>o p q r s</sup>     |
| 17                       | Brown Ale               | 3.96 ± 0.03 <sup>x y z</sup>       | 12.36 ± 1.45 <sup>t u v w</sup>     | 47                       | Porter                  | 4.08 ± 0.01 <sup>t u v w</sup>     | 27.00 ± 1.24 <sup>g h</sup>           |
| 18                       | Brown Ale               | 4.57 ± 0.01 <sup>d e f</sup>       | 31.80 ± 1.26 <sup>d e f</sup>       | 48                       | Porter                  | 4.27 ± 0.01 <sup>m n o p</sup>     | 32.16 ± 0.54 <sup>d e</sup>           |
| 19                       | Brown Ale               | 4.38 ± 0.01 <sup>i j k l</sup>     | 12.72 ± 2.39 <sup>s t u v w</sup>   | 49                       | Porter                  | 4.08 ± 0.00 <sup>t u v w</sup>     | 27.36 ± 1.44 <sup>g h</sup>           |
| 20                       | Brown Ale               | 3.74 ± 0.08 <sup>a c a d</sup>     | 16.44 ± 0.20 <sup>o p q r s</sup>   | 50                       | Porter                  | 4.17 ± 0.00 <sup>p q r s t</sup>   | 18.72 ± 1.24 <sup>k l m n o</sup>     |
| 21                       | California Common       | 4.29 ± 0.01 <sup>l m n o</sup>     | 16.44 ± 0.20 <sup>o p q r s</sup>   | 51                       | Porter                  | 4.02 ± 0.00 <sup>w x y</sup>       | 9.48 ± 1.70 <sup>w x y z</sup>        |
| 22                       | Cream Ale               | 3.84 ± 0.06 <sup>a a a b a c</sup> | 27.84 ± 0.74 <sup>f g h</sup>       | 52                       | Scottish Ale            | 4.24 ± 0.01 <sup>n o p q</sup>     | 18.24 ± 0.54 <sup>l m n o p q r</sup> |
| 23                       | Cream Ale               | 4.14 ± 0.01 <sup>q r s t u</sup>   | 16.44 ± 0.74 <sup>o p q r s</sup>   | 53                       | Stout                   | 4.34 ± 0.00 <sup>k l m n</sup>     | 16.08 ± 1.15 <sup>p q r s t</sup>     |
| 24                       | Dark Lager              | 4.13 ± 0.02 <sup>r s t u v</sup>   | 17.76 ± 1.09 <sup>n o p q r s</sup> | 54                       | Stout                   | 4.27 ± 0.02 <sup>m n o p</sup>     | 27.72 ± 1.08 <sup>g h</sup>           |
| 25                       | Dubbel                  | 3.92 ± 0.01 <sup>y z a a</sup>     | 40.68 ± 0.95 <sup>b</sup>           | 55                       | Sweet Stout             | 4.23 ± 0.00 <sup>o p q r</sup>     | 27.36 ± 1.90 <sup>g h</sup>           |
| 26                       | Golden Ale              | 4.36 ± 0.01 <sup>j k l m n</sup>   | 8.04 ± 1.45 <sup>x y z a a</sup>    | 56                       | Sweet Stout             | 4.03 ± 0.02 <sup>v w x</sup>       | 19.80 ± 0.0 <sup>l m n o p</sup>      |
| 27                       | Imperial Stout          | 4.45 ± 0.03 <sup>g h i j</sup>     | 37.92 ± 1.98 <sup>b c</sup>         | 57                       | Vienna                  | 4.21 ± 0.01 <sup>o p q r s</sup>   | 6.72 ± 1.84 <sup>y z a a</sup>        |
| 28                       | Imperial Stout          | 4.75 ± 0.00 <sup>b</sup>           | 40.32 ± 0.62 <sup>b</sup>           | 58                       | Weissbier               | 4.06 ± 0.03 <sup>u v w x</sup>     | 20.64 ± 0.74 <sup>j k l m n</sup>     |
| 29                       | India Pale Ale          | 4.47 ± 0.05 <sup>f g h i</sup>     | 21.84 ± 0.74 <sup>i j k l m</sup>   | 59                       | Witbier                 | 4.49 ± 0.04 <sup>f g h</sup>       | 30.72 ± 0.20 <sup>e f g</sup>         |
| 30                       | India Pale Ale          | 4.76 ± 0.05 <sup>b</sup>           | 24.12 ± 0.36 <sup>h i j k</sup>     | 60                       | Witbier                 | 3.35 ± 0.05 <sup>a f</sup>         | 35.40 ± 0.54 <sup>c d</sup>           |

<sup>1</sup> Beer brands were assigned a number (1-60).

<sup>2</sup> Beer style established by the Beer Judge Certification Program (BJCP).

<sup>3</sup> Values accepted by NOM-199-SCFI-2007: ≤ 10 000 mg lactic acid/L.

Values represent means ± standard deviation. Means with different letters per column indicate significant statistical differences (Tukey, p ≤ 0.05).

Table S7: Comparison between real value and predicted value of the validation data using a Dunnett's test.

| Sample | Parameter  | Real value | Predicted value | Grouping | Sample | Parameter  | Real value | Predicted value | Grouping | Sample | Parameter  | Real value | Predicted value | Grouping |
|--------|------------|------------|-----------------|----------|--------|------------|------------|-----------------|----------|--------|------------|------------|-----------------|----------|
| 1      | Color      | 32.20      | 33.57           | A        | 6      | Color      | 8.70       | 7.94            | A        | 11     | Color      | 14.40      | 14.58           | A        |
|        | Alcohol    | 4.40       | 4.49            | A        |        | Alcohol    | 6.90       | 6.76            | A        |        | Alcohol    | 5.60       | 5.46            | A        |
|        | Bitterness | 12.50      | 12.02           | A        |        | Bitterness | 39.00      | 40.88           | A        |        | Bitterness | 36.00      | 35.23           | A        |
|        | Turbidity  | 4.60       | 4.35            | A        |        | Turbidity  | 3.00       | 3.45            | A        |        | Turbidity  | 6.00       | 5.42            | A        |
|        | pH         | 4.27       | 4.24            | A        |        | pH         | 4.61       | 4.62            | A        |        | pH         | 4.51       | 4.50            | A        |
|        | Acidity    | 14.40      | 14.28           | A        |        | Acidity    | 25.44      | 25.11           | A        |        | Acidity    | 10.44      | 10.73           | A        |
| 2      | Color      | 4.40       | 4.41            | A        | 7      | Color      | 12.20      | 11.67           | A        | 12     | Color      | 9.10       | 8.22            | A        |
|        | Alcohol    | 7.00       | 6.89            | A        |        | Alcohol    | 3.70       | 3.95            | A        |        | Alcohol    | 4.00       | 3.97            | A        |
|        | Bitterness | 24.50      | 23.76           | A        |        | Bitterness | 21.00      | 20.62           | A        |        | Bitterness | 14.50      | 14.27           | A        |
|        | Turbidity  | 5.00       | 5.51            | A        |        | Turbidity  | 10.00      | 10.76           | A        |        | Turbidity  | 20.00      | 19.49           | A        |
|        | pH         | 3.92       | 3.91            | A        |        | pH         | 3.85       | 3.83            | A        |        | pH         | 3.46       | 3.48            | A        |
|        | Acidity    | 18.60      | 19.63           | A        |        | Acidity    | 19.08      | 19.13           | A        |        | Acidity    | 32.16      | 31.01           | A        |
| 3      | Color      | 8.40       | 8.27            | A        | 8      | Color      | 4.40       | 4.58            | A        | 13     | Color      | 48.30      | 47.33           | A        |
|        | Alcohol    | 3.10       | 2.99            | A        |        | Alcohol    | 3.60       | 3.76            | A        |        | Alcohol    | 4.50       | 4.69            | A        |
|        | Bitterness | 41.00      | 40.20           | A        |        | Bitterness | 10.00      | 10.46           | A        |        | Bitterness | 25.00      | 24.73           | A        |
|        | Turbidity  | 4.23       | 4.29            | A        |        | Turbidity  | 15.30      | 14.84           | A        |        | Turbidity  | 4.00       | 4.17            | A        |
|        | pH         | 19.08      | 19.70           | A        |        | pH         | 3.51       | 3.54            | A        |        | pH         | 4.17       | 4.17            | A        |
|        | Acidity    | 4.00       | 4.52            | A        |        | Acidity    | 18.92      | 18.56           | A        |        | Acidity    | 18.72      | 19.26           | A        |
| 4      | Color      | 2.20       | 2.20            | A        | 9      | Color      | 9.30       | 10.06           | A        | 14     | Color      | 16.16      | 16.67           | A        |
|        | Alcohol    | 2.10       | 2.45            | A        |        | Alcohol    | 4.60       | 4.85            | A        |        | Alcohol    | 3.50       | 3.81            | A        |
|        | Bitterness | 26.50      | 27.50           | A        |        | Bitterness | 10.50      | 10.90           | A        |        | Bitterness | 23.00      | 24.43           | A        |
|        | Turbidity  | 5.00       | 5.29            | A        |        | Turbidity  | 22.00      | 21.03           | A        |        | Turbidity  | 39.60      | 40.75           | A        |
|        | pH         | 4.23       | 4.26            | A        |        | pH         | 4.11       | 4.14            | A        |        | pH         | 4.29       | 4.23            | A        |
|        | Acidity    | 6.36       | 7.29            | A        |        | Acidity    | 19.96      | 19.71           | A        |        | Acidity    | 16.44      | 15.89           | A        |
| 5      | Color      | 9.80       | 9.64            | A        | 10     | Color      | 56.00      | 55.61           | A        | 15     | Color      | 18.00      | 17.08           | A        |
|        | Alcohol    | 6.10       | 6.00            | A        |        | Alcohol    | 5.00       | 5.06            | A        |        | Alcohol    | 4.50       | 4.40            | A        |
|        | Bitterness | 47.50      | 47.23           | A        |        | Bitterness | 12.00      | 12.46           | A        |        | Bitterness | 25.00      | 24.11           | A        |
|        | Turbidity  | 22.30      | 23.13           | A        |        | Turbidity  | 23.00      | 22.72           | A        |        | Turbidity  | 44.30      | 43.94           | A        |
|        | pH         | 4.30       | 4.34            | A        |        | pH         | 4.03       | 4.06            | A        |        | pH         | 4.13       | 4.11            | A        |
|        | Acidity    | 20.16      | 19.75           | A        |        | Acidity    | 19.80      | 19.52           | A        |        | Acidity    | 17.76      | 16.61           | A        |

Different letters per row indicate significant statistical differences ( $p \leq 0.05$ ) for each parameter per sample.
